# Supplementary material for: AF4-ICP-MS as a powerful tool for the separation of gold nanorods and nanospheres
Source: Royal Society of Chemistry journal article supplement (doi:10.1039/d0ja00123f), 2020-01-01
Supplement: d0ja00123f1.pdf [file d0ja00123f1.pdf]

## Supplementary Material

### AF4-ICP-MS as a powerful tool for the separation of gold nanorods and nanospheres

Sara López-Sanz <sup>a</sup>, Nuria Rodríguez Fariñas <sup>a</sup>, Mohammed Zougagh <sup>b</sup>, Rosa del Carmen Rodríguez Martín-Doimeadios <sup>a,\*</sup>, Ángel Ríos <sup>c,\*</sup>

<sup>a</sup> Department of Analytical Chemistry and Food Technology, Environmental Sciences Institute (ICAM), University of Castilla-La Mancha, Avda. Carlos III s/n, 45071 Toledo, Spain.

<sup>b</sup> Department of Analytical Chemistry and Food Technology, Faculty of Pharmacy, University of Castilla-La Mancha, Campus Universitario, 02071 Albacete, Spain.

<sup>c</sup> Department of Analytical Chemistry and Food Technology, Faculty of Chemical Sciences and Technologies, University of Castilla-La Mancha, Avda. Camilo José Cela s/n, 13071 Ciudad Real, Spain.

(\*) Corresponding author:

Dr. Ángel Ríos Castro

E-mail: [angel.rios@uclm.es](mailto:angel.rios@uclm.es)

Dr. Rosa del Carmen Rodríguez Martín-Doimeadios

E-mail: [rosacarmen.rodriguez@uclm.es](mailto:rosacarmen.rodriguez@uclm.es)

**Table S1.** AF4 gradients of cross flow evaluated.

|                     | <b>Time (min)</b> | <b>Regime</b>                         | <b>Cross flow (mL min<sup>-1</sup>)</b> |
|---------------------|-------------------|---------------------------------------|-----------------------------------------|
| <b>Program A</b>    |                   |                                       |                                         |
| Injection/Focussing | 5                 | Injec. Flow 0.20 mL min <sup>-1</sup> | 0.5                                     |
| Elution cross flow  | 20                | Linear decay                          | 0.5 - 0                                 |
|                     | 20                | Constant                              | 0                                       |
| <b>Program B</b>    |                   |                                       |                                         |
| Injection/Focussing | 5                 | Injec. Flow 0.20 mL min <sup>-1</sup> | 0.5                                     |
| Elution cross flow  | 6                 | Linear decay                          | 0.5 - 0.25                              |
|                     | 18                | Linear decay                          | 0.25 - 0                                |
|                     | 16                | Constant                              | 0                                       |
| <b>Program C</b>    |                   |                                       |                                         |
| Injection/Focussing | 5                 | Injec. Flow 0.20 mL min <sup>-1</sup> | 0.5                                     |
| Elution cross flow  | 20                | Power (Exponent 1.5)                  | 0.5 - 0                                 |
|                     | 20                | Constant                              | 0                                       |

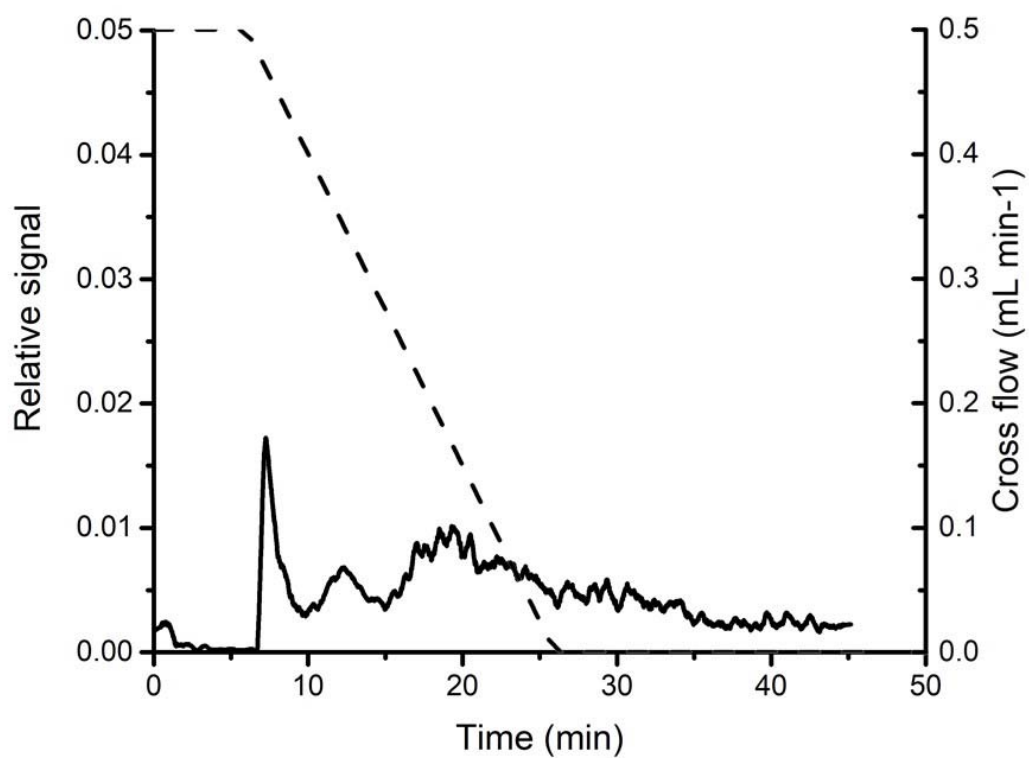

**Figure S1.** AF4-ICP-MS fractogram of a mixture containing commercially available 20 nm AuNSs ( $87 \text{ ng mL}^{-1}$ ) and 5.63 aspect ratio AuNRs ( $104 \text{ ng mL}^{-1}$ ) obtained with the cross flow program A (dash line). Carrier: 0.01 % SDS, 1 mM  $\text{NaH}_2\text{PO}_4$ , 1 mM  $\text{Na}_2\text{HPO}_4$ , pH 7.

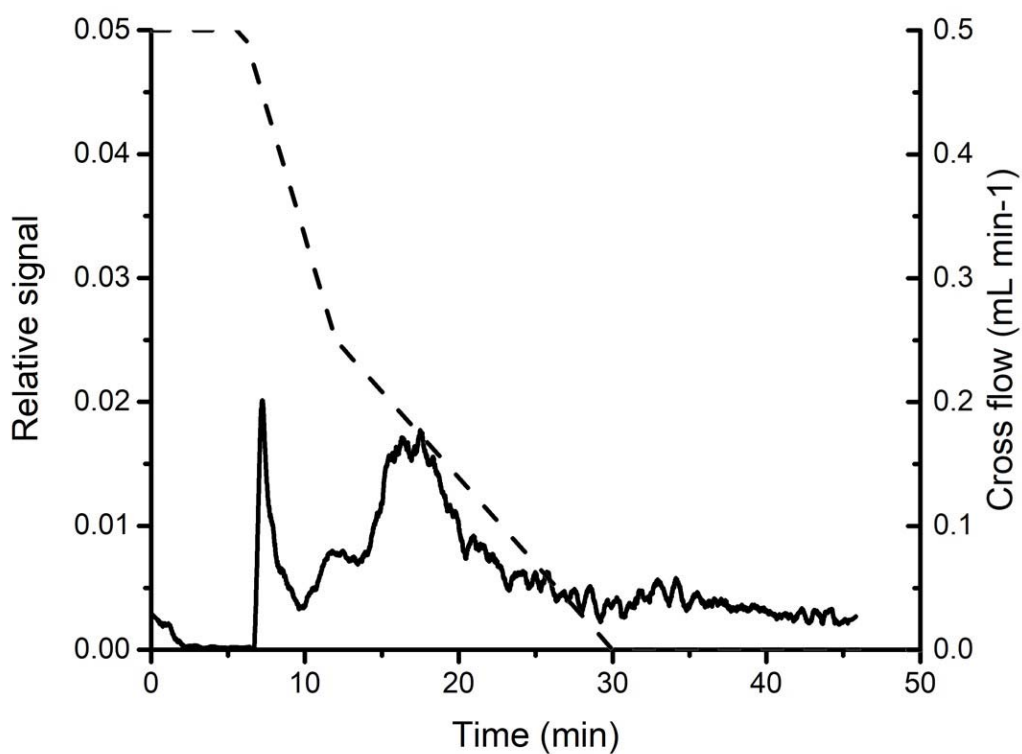

**Figure S2.** AF4-ICP-MS fractogram of a mixture containing commercially available 20 nm AuNSs ( $87 \text{ ng mL}^{-1}$ ) and 5.63 aspect ratio AuNRs ( $104 \text{ ng mL}^{-1}$ ) obtained with the cross flow program B (dash line). Carrier: 0.01 % SDS, 1 mM  $\text{NaH}_2\text{PO}_4$ , 1 mM  $\text{Na}_2\text{HPO}_4$ , pH 7.

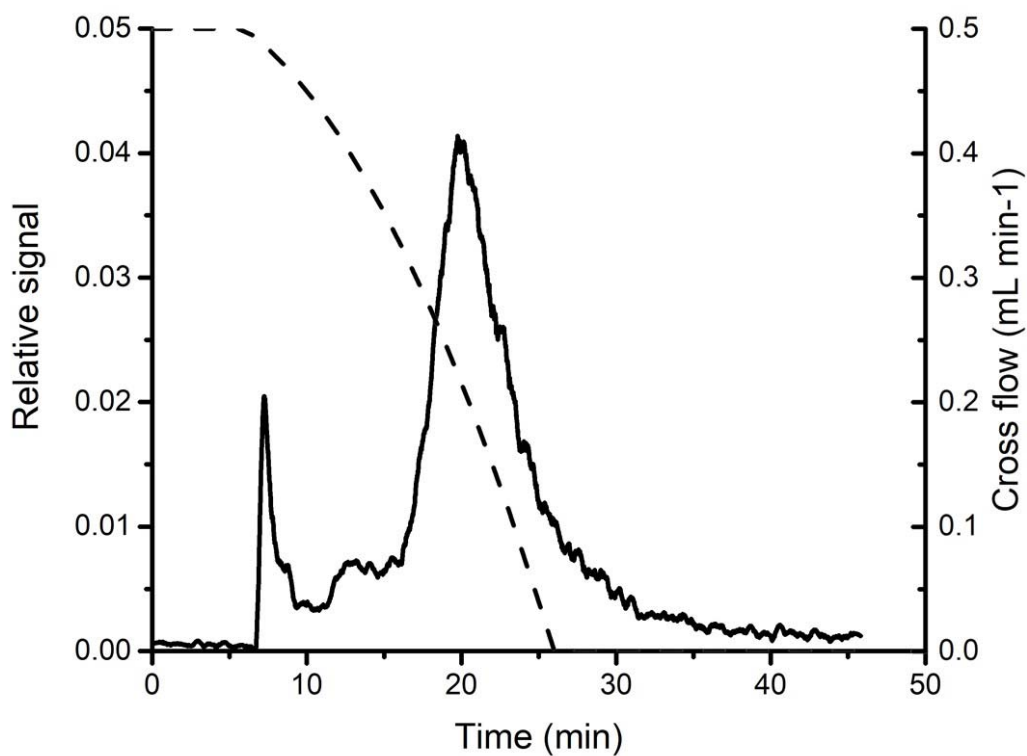

**Figure S3.** AF4-ICP-MS fractogram of a mixture containing commercially available 20 nm AuNSs ( $87 \text{ ng mL}^{-1}$ ) and 5.63 aspect ratio AuNRs ( $104 \text{ ng mL}^{-1}$ ) obtained with the cross flow program C (dash line). Carrier: 0.01 % SDS, 1 mM  $\text{NaH}_2\text{PO}_4$ , 1 mM  $\text{Na}_2\text{HPO}_4$ , pH 7.

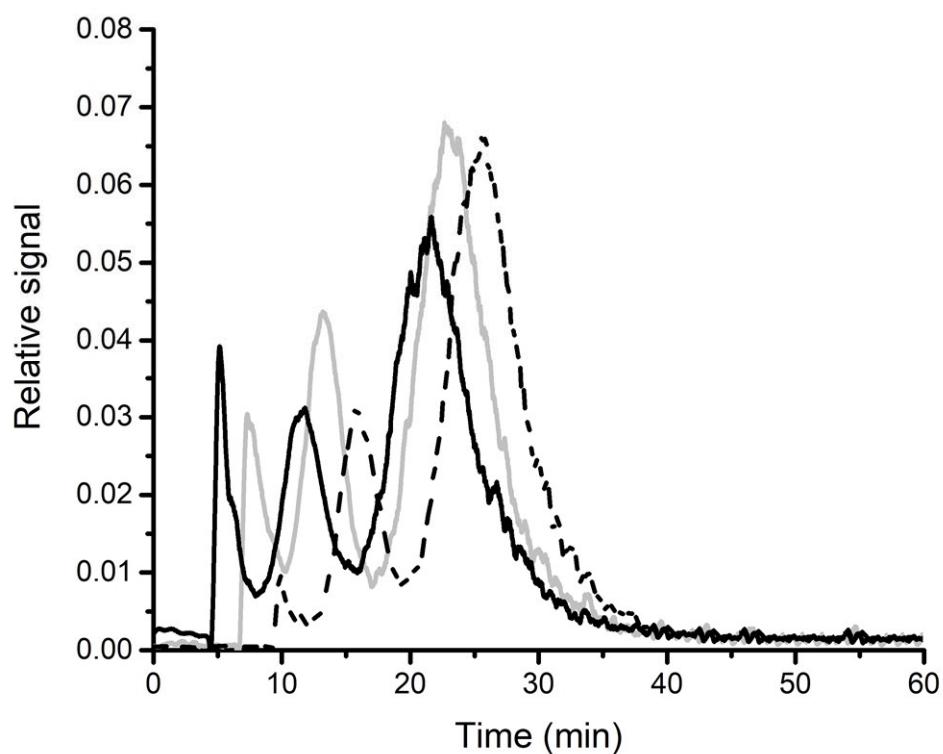

**Figure S4.** AF4-ICP-MS fractogram of a mixture containing commercially available 20 nm AuNSs ( $87 \text{ ng mL}^{-1}$ ) and 5.63 aspect ratio AuNRs ( $104 \text{ ng mL}^{-1}$ ) using three cross flow programs with different injection times: 2.5 min (black line), 5 min (grey line) and 7.5 min (dash line) modified from Table 1.

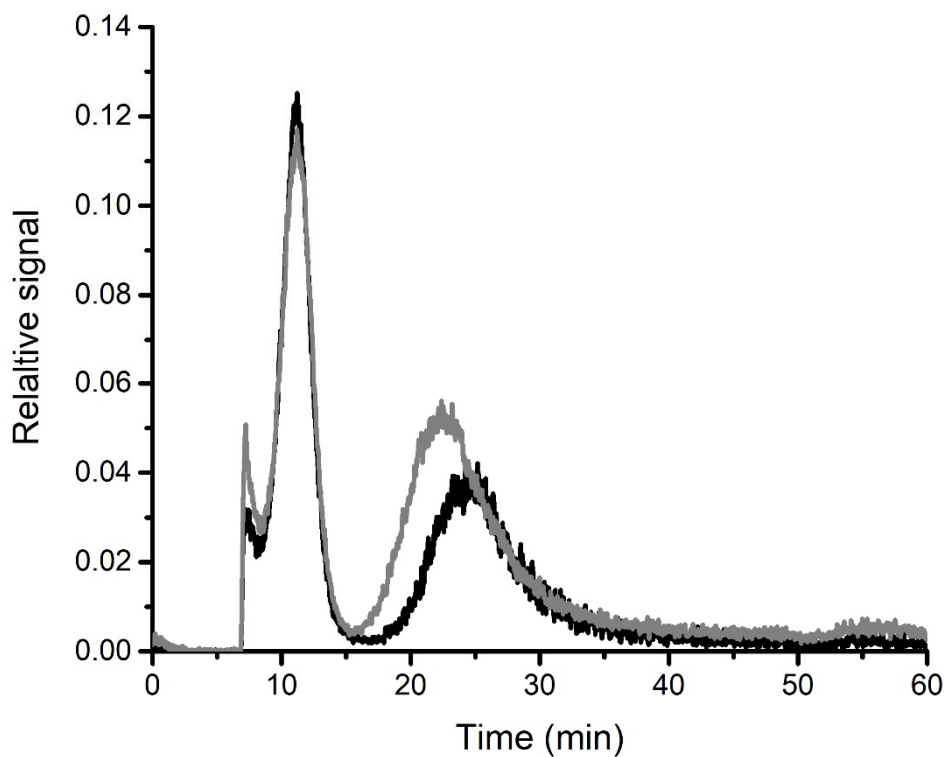

**Figure S5.** AF4-ICP-MS fractogram of a mixture containing commercially available 10 nm AuNSs ( $108 \text{ ng mL}^{-1}$ ) and 5.63 aspect ratio AuNRs ( $60 \text{ ng mL}^{-1}$ ) (black line) or 5.79 aspect ratio AuNRs ( $126 \text{ ng mL}^{-1}$ ) (grey line). Optimal cross flow program Table 1. Carrier: 0.01 % SDS, 1 mM  $\text{NaH}_2\text{PO}_4$ , 1 mM  $\text{Na}_2\text{HPO}_4$ , pH 7.
